# Supplementary material for: Growth of hybrid open access, 2009–2016
Source: PeerJ. 2017 Sep 29;5:e3878. doi: 10.7717/peerj.3878 (PMC5624290; doi:10.7717/peerj.3878)
Supplement: Supplemental Information 1 [file peerj-05-3878-s001.xlsx]

## Sheet: Sheet1
Raw data for the figures reported in Figure 1 and figure 2 of the article
"Growth of hybrid open access, 2009-2016", submitted to PeerJ, 2017, by Bo-Christer Björk
		Hybrid article numbers
		2009	2010	2011	2012	2013	2014	2015	2016
Springer
Nature Group
sum Springer&NPG	from 2014
Taylor & francis
Wiley&Blackwell
SAGE
Elsevier
5 big together		5510	7774	9377	10802	13994	21964	29797	35503
BMJ Group
IOP Science
American Physical Society
IUC
ACS
Royal Society
OUP
CUP
Emerald
PNAS
Royal society of chemistry
AIP
Company of Biologists
Portland Press
Brill
All 20 publishers		8095	10676	12089	14405	18662	21964	29797	35503
		Hybrid journal numbers
5 big		1836		4000			7114		8359
20 publishers		2017		4381			8230		9678
